# Supplementary material for: A bibliometric analysis of knowledge mapping in Chinese education digitalization research from 2012 to 2022
Source: Springer Nature journal article supplement (doi:10.1057/s41599-024-03010-8), 2024-04-11

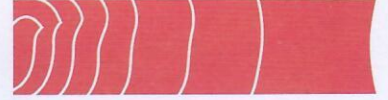

## Certificate of Employment

03/28/2024

Dear Sir or Madam,

This is to certify that Mrs. Rui Shi, born on November 26, 1989, is an employee of College of International Cultural Communication and International Education of our university since 07/01/2014. Her position in our university is lecturer.

Sincerely yours,

Position: Chief of Personnel Division

Name of the reference: Zhang Zhouyan

Signature:

Communication University of Zhejiang

Add: 998 Xueyuan Street, Xiasha High Education Zone Hangzhou, P.R. China

Tel: +86 571 86832658

Fax: +86 571 86876776

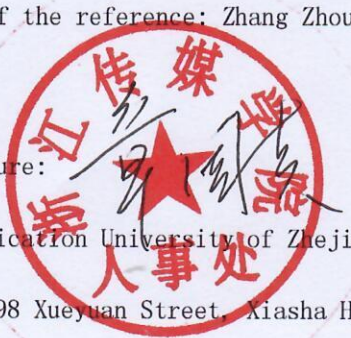

Supplement: 41599_2024_3010_MOESM3_ESM.pdf [file 41599_2024_3010_MOESM3_ESM.pdf]
